# Supplementary material for: Association of Metallic and Nonmetallic Elements with Fibrin Clot Properties and Ischemic Stroke
Source: MDPI journal article supplement (doi:10.3390/life14050634), 2024-05-16
Supplement: s1 [file s1]

## Association of Metallic and Nonmetallic Elements with Fibrin Clot Properties and Ischemic Stroke

Hieronim Jakubowski <sup>1,2,\*</sup>, Marta Sikora <sup>3</sup>, Ewa Bretes <sup>2</sup>, Joanna Perla-Kaján <sup>2</sup>, Olga Utyro <sup>2</sup>, Izabela Wojtasz <sup>4</sup>, Radosław Kaźmierski <sup>5,6</sup>, Marcin Frankowski <sup>7</sup> and Anetta Ziola-Frankowska <sup>7</sup>

### Supporting Information

**Figure S1.** Illustration of clotting and lysis variables. Variables examined in the present study, fibrin CLT and fibrin Abs<sub>max</sub>, are highlighted in bold. Reproduced with permission from Sikora et al., PlosOne 2022.

**Figure S2.** Pearsons's correlations between plasma metallic/nonmetallic elements and fibrin clot properties in healthy controls and stroke patients. Zinc (A-D), calcium (E-H), beryllium (I, J), and sulfur (K-N). CLT (A, C, E, G, I, J, K, M) and Abs<sub>max</sub> (B, D, F, H, L, N). Healthy controls (A, B, E, F, I, K, L) and stroke patients (C, D, G, H, J, M, N). Higher values of CLT and Abs<sub>max</sub> usually indicate lower susceptibility to lysis and worse clot structure, respectively.

**Figure S3.** Relationships between serum elements and age in healthy controls and stroke patients. Levels of sodium (A, B), lithium (C, D), copper (E, F), iron (G, H), beryllium (I, J), aluminum (K, L), silicon (M, N) and strontium (O, P) are plotted vs. age in healthy individuals (A, C, E, G, I, K, M, O) and stroke patients (B, D, F, H, J, L, N, P).

**Figure S4.** Relationships between serum elements and glomerular filtration rate (GFR) in healthy controls and stroke patients. Levels of sodium (A, B), potassium (C, D), lithium (E, F), strontium (G, H), copper (I, J), aluminum (K, L), and silicon (M, N) are plotted vs. GFR in healthy individuals (A, C, E, G, I, K, M) and stroke patients (B, D, F, H, J, L, N).

**Table S1.**

**Table S3.** Correlations between turbidimetric clotting and lysis variables in stroke patients and healthy individuals.

**Table S4.** Descriptive statistics of the variables analyzed in the present study.

**Table S5.** Correlations between fibrin clot properties vs. metals in stroke patients and healthy individuals.

**Table S5.** R<sup>2</sup> values and the risk of ischemic stroke associated with individual elements.

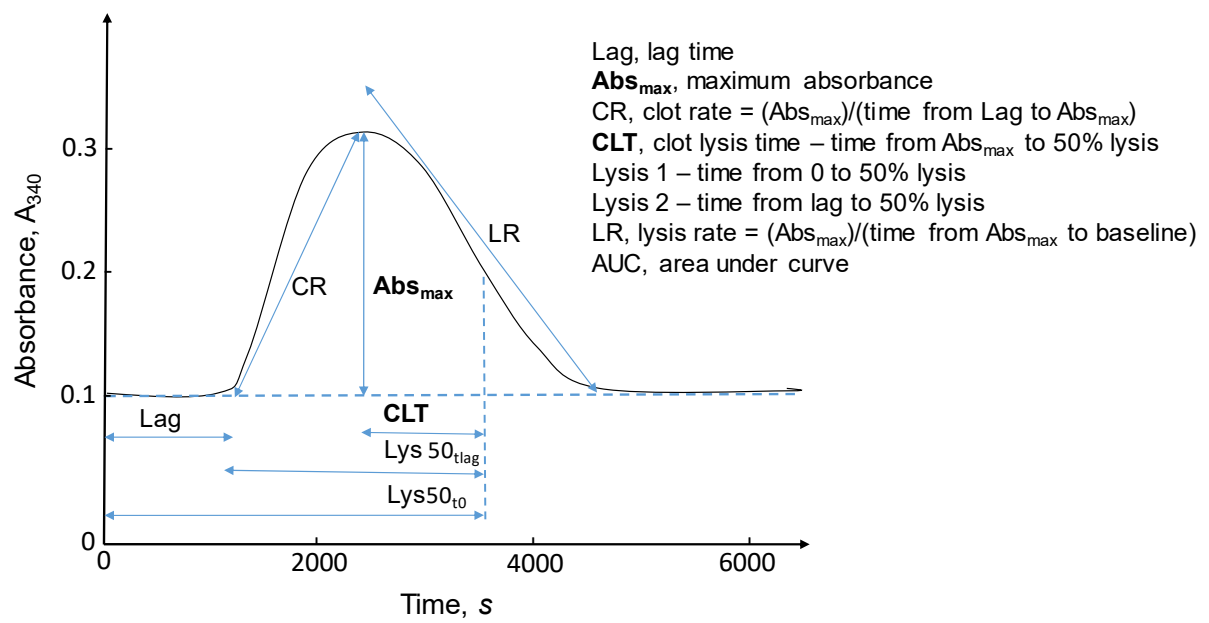

Figure S1.

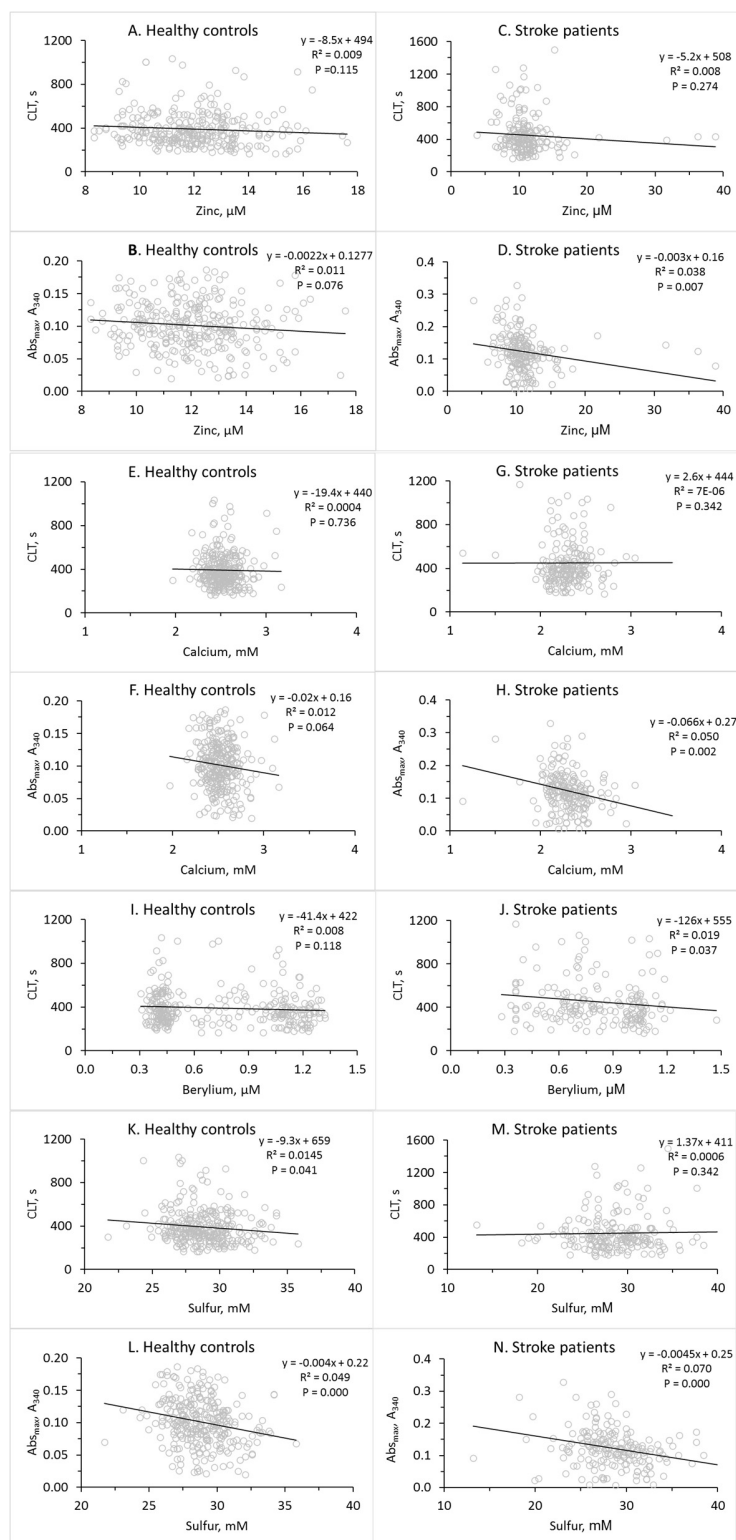

Figure S2A-M

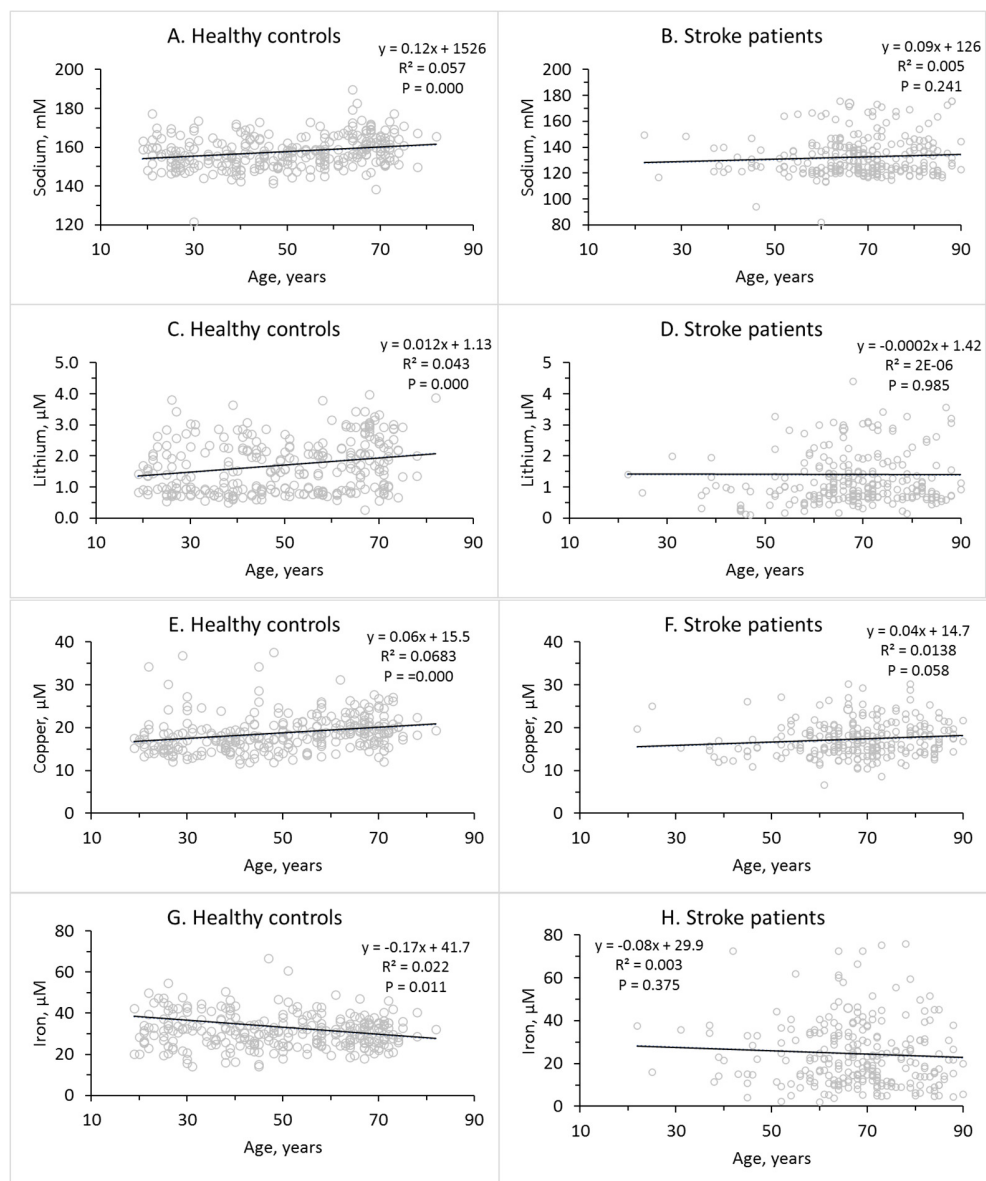

**Figure S3A-H**

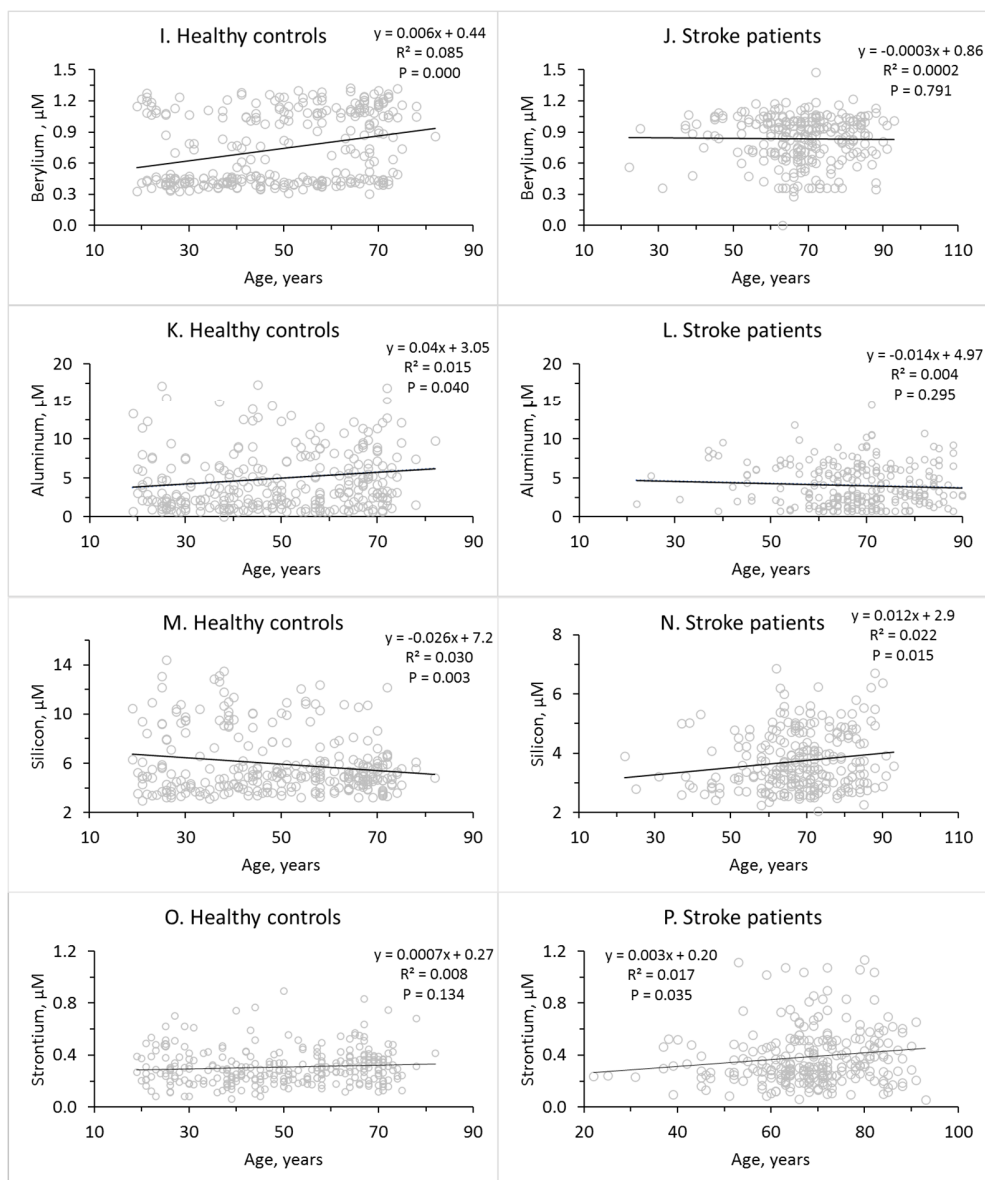

**Figure S3I-P**

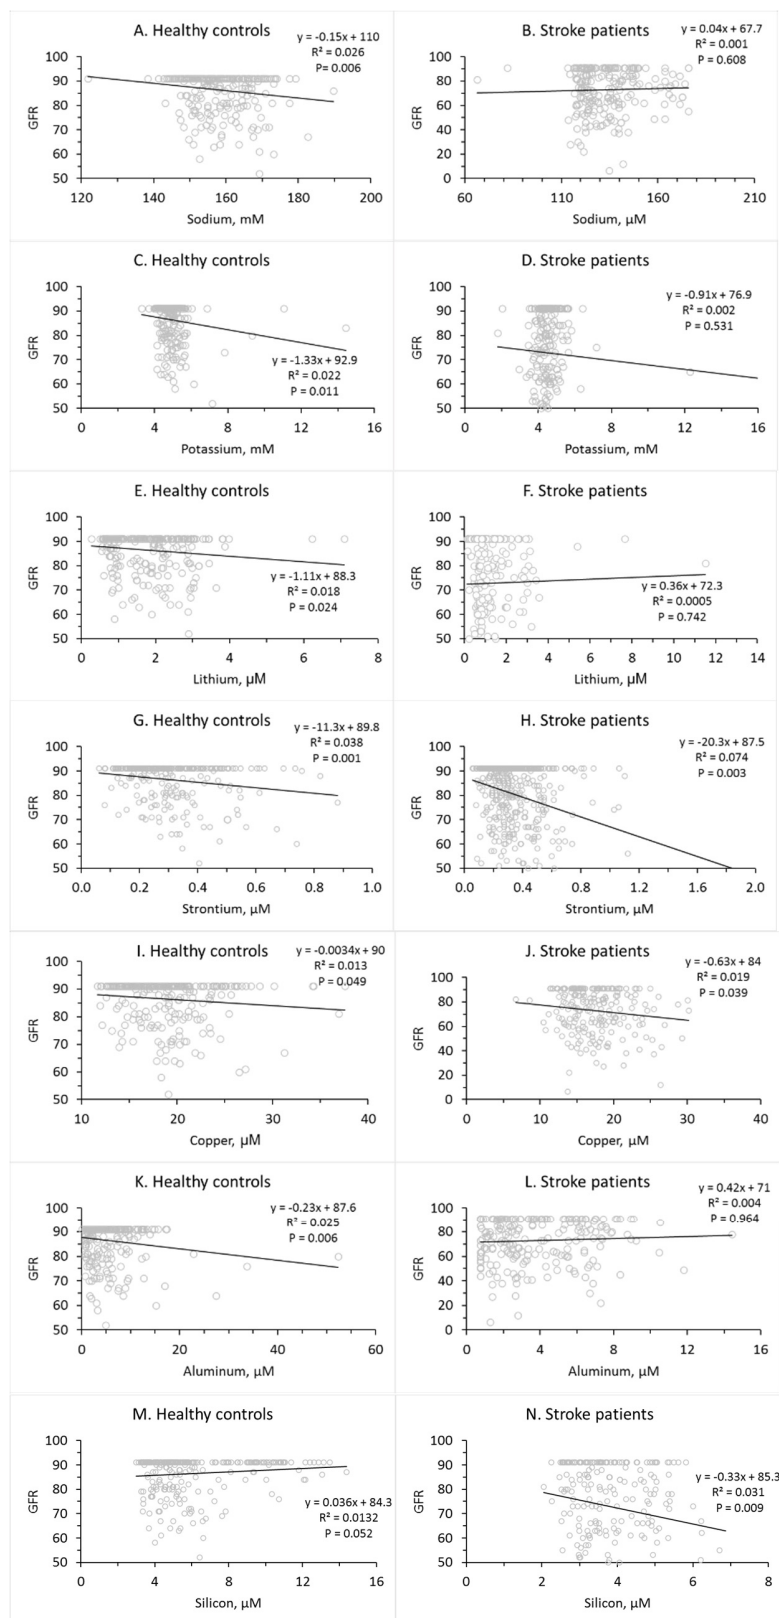

Figure S4A-N

**Table S1.** Settings of ICP instruments used for the quantification of metallic/non-metallic elements in serum.

| Elements                              | Analytical techniques                                              |                                                                                         | ICP settings                                                                                                                                                                                                                                                                                                                                                                                                                                                                                                |
|---------------------------------------|--------------------------------------------------------------------|-----------------------------------------------------------------------------------------|-------------------------------------------------------------------------------------------------------------------------------------------------------------------------------------------------------------------------------------------------------------------------------------------------------------------------------------------------------------------------------------------------------------------------------------------------------------------------------------------------------------|
| Ca, Mg, Na, K, P, S                   | Inductively coupled plasma optical emission spectrometry (ICP-OES) | Inductively coupled plasma optical emission spectrometer (ICP-OE 9820, Shimadzu, Japan) | Radio frequency power generator: 1.2 kW; gas: argon; plasma gas flow rate: 9.00 L min <sup>-1</sup> ; auxiliary gas flow rate: 0.6 L min <sup>-1</sup> ; nebulization gas flow rate: 0.7 L min <sup>-1</sup> ; plasma view: vertical torch, axial view; torch: mini-torch (quartz); nebulizer: coaxial; chamber: cyclone (glass); spray chamber temperature: room temperature; drain: gravity fed; injector tube: quartz (1.2 mm i.d.); background correction: 2-points; exposure time: 30 s                |
| Al, Be, Cu, Fe, Ni, Li, Sr, Zn, B, Si | Inductively coupled plasma mass spectrometry (ICP-MS)              | Inductively coupled plasma mass spectrometer (ICP-MS 2030, Shimadzu, Japan)             | Radio frequency power generator: 1.2 kW; gas: argon; plasma gas flow rate: 8.0 L min <sup>-1</sup> ; auxiliary gas flow rate: 1.1 L min <sup>-1</sup> ; nebulization gas flow rate: 0.7 L min <sup>-1</sup> ; torch: mini-torch (quartz); nebulizer: coaxial; chamber: cyclone (glass); spray chamber temperature: 5°C; drain: gravity fed; internal standard: automatic addition; sampling depth: 5 mm; collision cell gas flow: 6.5 mL min <sup>-1</sup> (He); cell voltage: -21 V, energy filter: 7.0 V. |

**Table S2.** ICP-MS isotopes and ICP-OES emission lines, LOD, and LOQ values for quantification of metallic and non-metallic elements

| Element | Isotope or wavelength (nm)* | LOD (µg/L) | LOQ (µg/L) |
|---------|-----------------------------|------------|------------|
| Ca      | 396.8*                      | 0.572      | 1.907      |
| Mg      | 279.5*                      | 0.035      | 0.117      |
| Na      | 589.6*                      | 0.044      | 0.146      |
| K       | 766.5*                      | 1.662      | 5.541      |
| P       | 178.3*                      | 31.13      | 103.7      |
| S       | 182.6*                      | 3.164      | 10.54      |
| Al      | 27                          | 0.541      | 1.803      |
| B       | 11                          | 1.309      | 4.365      |
| Ba      | 138                         | 0.104      | 0.347      |
| Be      | 9                           | 0.008      | 0.028      |
| Cu      | 63                          | 0.051      | 0.170      |
| Fe      | 56                          | 0.041      | 0.137      |
| Ni      | 58                          | 0.022      | 0.073      |
| Li      | 7                           | 0.068      | 0.265      |
| Si      | 28                          | 1.126      | 4.321      |
| Sr      | 88                          | 0.047      | 0.157      |
| Zn      | 66                          | 0.036      | 0.120      |



| <b>Table S3.</b> Correlation coefficients for relationships between turbidimetric clotting and lysis variables in stroke patients and healthy individuals*.                                                                                                                                                                                                                                                                                        |                                         |           |                     |                       |                                          |                    |                |
|----------------------------------------------------------------------------------------------------------------------------------------------------------------------------------------------------------------------------------------------------------------------------------------------------------------------------------------------------------------------------------------------------------------------------------------------------|-----------------------------------------|-----------|---------------------|-----------------------|------------------------------------------|--------------------|----------------|
| Clotting/lysis correlation coefficients                                                                                                                                                                                                                                                                                                                                                                                                            |                                         |           |                     |                       |                                          |                    |                |
| Variable                                                                                                                                                                                                                                                                                                                                                                                                                                           | MaxAbs, Abs <sub>max</sub> <sup>*</sup> | Clot Rate | Lys50 <sub>t0</sub> | Lys50 <sub>tlag</sub> | Lysis50 <sub>MA</sub> , CLT <sup>*</sup> | Lysis Rate         | Lysis Area AUC |
| Stroke patients (n = 191)                                                                                                                                                                                                                                                                                                                                                                                                                          |                                         |           |                     |                       |                                          |                    |                |
| Lag                                                                                                                                                                                                                                                                                                                                                                                                                                                | -0.61                                   | -0.65     | 0.45                | -0.02<br>(P=0.801)    | -0.01<br>(P=0.929)                       | 0.44               | 0.41           |
| AbsMax, Abs <sub>max</sub> <sup>*</sup>                                                                                                                                                                                                                                                                                                                                                                                                            |                                         | 0.89      | -0.10<br>(P=0.183)  | 0.21<br>(P=0.003)     | 0.29                                     | -0.77              | 0.88           |
| Clot Rate                                                                                                                                                                                                                                                                                                                                                                                                                                          |                                         |           | -0.45               | -0.16<br>(P=0.026)    | 0.01<br>(P=0.837)                        | -0.72              | 0.61           |
| Lys50 <sub>t0</sub>                                                                                                                                                                                                                                                                                                                                                                                                                                |                                         |           |                     | 0.89                  | 0.86                                     | -0.07<br>(P=0.204) | 0.65           |
| Lys50 <sub>tlag</sub>                                                                                                                                                                                                                                                                                                                                                                                                                              |                                         |           |                     |                       | 0.75                                     | -0.05<br>(P=0.553) | 0.51           |
| Lysis50 <sub>MA</sub> , CLT <sup>*</sup>                                                                                                                                                                                                                                                                                                                                                                                                           |                                         |           |                     |                       |                                          | -0.05<br>(P=0.527) | 0.58           |
| Lysis Rate                                                                                                                                                                                                                                                                                                                                                                                                                                         |                                         |           |                     |                       |                                          |                    | -0.54          |
| Healthy controls (n = 291)                                                                                                                                                                                                                                                                                                                                                                                                                         |                                         |           |                     |                       |                                          |                    |                |
| Lag                                                                                                                                                                                                                                                                                                                                                                                                                                                | -0.60                                   | -0.51     | 0.17<br>(P=0.003)   | -0.29                 | -0.14<br>(P=0.013)                       | 0.44               | 0.42           |
| AbsMax, Abs <sub>max</sub> <sup>*</sup>                                                                                                                                                                                                                                                                                                                                                                                                            |                                         | 0.88      | -0.32               | 0.60                  | 0.55                                     | -0.70              | 0.88           |
| Clot Rate                                                                                                                                                                                                                                                                                                                                                                                                                                          |                                         |           | 0.00<br>(P=0.982)   | 0.25                  | 0.35                                     | -0.70              | 0.64           |
| Lys50 <sub>t0</sub>                                                                                                                                                                                                                                                                                                                                                                                                                                |                                         |           |                     | 0.89                  | 0.86                                     | -0.07<br>(P=0.204) | 0.65           |
| Lys50 <sub>tlag</sub>                                                                                                                                                                                                                                                                                                                                                                                                                              |                                         |           |                     |                       | 0.91                                     | -0.27              | 0.82           |
| Lysis50 <sub>MA</sub> , CLT <sup>*</sup>                                                                                                                                                                                                                                                                                                                                                                                                           |                                         |           |                     |                       |                                          | -0.28              | 0.79           |
| Lysis Rate                                                                                                                                                                                                                                                                                                                                                                                                                                         |                                         |           |                     |                       |                                          |                    | -0.48          |
| <p>*Nomenclature is after Carter <i>et al.</i>, <i>Arterioscler Thromb Vasc Biol</i> 2007; 27:2783-2789. The clotting and lysis variables are illustrated in <b>Figure S1</b>. Terms Abs<sub>max</sub> and CLT are used in the present study and refer to terms MaxAbs and Lysis50<sub>MA</sub>, respectively, of Carter <i>et al.</i> <i>ATVB</i> 2007. <i>P</i> values for these correlations were &lt;0.000 except where written otherwise.</p> |                                         |           |                     |                       |                                          |                    |                |

| <b>Table S4.</b> Descriptive statistics of the variables analyzed in the present study.                                                                                                                                                                                                                                      |                        |                         |                |
|------------------------------------------------------------------------------------------------------------------------------------------------------------------------------------------------------------------------------------------------------------------------------------------------------------------------------|------------------------|-------------------------|----------------|
| <b>Variable</b>                                                                                                                                                                                                                                                                                                              | <b>Stroke patients</b> | <b>Healthy controls</b> | <b>P-value</b> |
| Fibrin clot properties                                                                                                                                                                                                                                                                                                       |                        |                         |                |
|                                                                                                                                                                                                                                                                                                                              | (n = 191)              | (n = 291)               |                |
| Fibrin Abs <sub>max</sub> , A <sub>340</sub>                                                                                                                                                                                                                                                                                 | 0.123±0.065            | 0.101±0.036             | 0.000          |
| Fibrin CLT, s                                                                                                                                                                                                                                                                                                                | 450±225                | 391±154                 | 0.001          |
| Metals                                                                                                                                                                                                                                                                                                                       |                        |                         |                |
|                                                                                                                                                                                                                                                                                                                              | (n = 260)              | (n = 291)               |                |
| Fe, µM                                                                                                                                                                                                                                                                                                                       | 24.3±17.3              | 33.3±19.0               | 0.000          |
| Cu, µM                                                                                                                                                                                                                                                                                                                       | 17.3±4.0               | 18.7±4.1                | 0.000          |
| Zn, µM                                                                                                                                                                                                                                                                                                                       | 11.1±3.6               | 12.0±1.7                | 0.000          |
| Ni, µM                                                                                                                                                                                                                                                                                                                       | 0.31±0.55              | 0.62±0.37               | 0.000          |
| Ca, mM                                                                                                                                                                                                                                                                                                                       | 2.29±0.21              | 2.52±0.16               | 0.000          |
| Sr, µM                                                                                                                                                                                                                                                                                                                       | ↑0.39±0.25             | 0.31±0.14               | 0.000          |
| Mg, mM                                                                                                                                                                                                                                                                                                                       | 0.83±0.10              | 0.86±0.06               | 0.000          |
| Li, µM                                                                                                                                                                                                                                                                                                                       | 1.40±1.92              | 1.70±0.93               | 0.018          |
| Na, mM                                                                                                                                                                                                                                                                                                                       | 131±17                 | 158±8                   | 0.000          |
| K, mM                                                                                                                                                                                                                                                                                                                        | 4.66±1.50              | 4.83±0.72               | 0.000          |
| Be, µM                                                                                                                                                                                                                                                                                                                       | ↑0.84±0.22             | 0.74±0.34               | 0.000          |
| Al, µM                                                                                                                                                                                                                                                                                                                       | 4.02±2.65              | 4.96±5.22               | 0.007          |
|                                                                                                                                                                                                                                                                                                                              |                        |                         |                |
| B, µM                                                                                                                                                                                                                                                                                                                        | 37.7±117               | 26.7±72.5               | 0.247          |
| P, µM                                                                                                                                                                                                                                                                                                                        | 3.69±0.76              | 3.85±0.49               | 0.004          |
| S, mM                                                                                                                                                                                                                                                                                                                        | 28.9±3.6               | 28.8±2.0                | 0.520          |
| Si, µM                                                                                                                                                                                                                                                                                                                       | 3.73±0.97              | 5.93±2.47               | 0.000          |
| Nonmetals                                                                                                                                                                                                                                                                                                                    |                        |                         |                |
| Plasma creatinine, µM                                                                                                                                                                                                                                                                                                        | ↑87.7±33.6             | 70.5±13.2               | 0.000          |
| Plasma glucose, mM                                                                                                                                                                                                                                                                                                           | ↑6.6±2.7               | 5.6±0.7                 | 0.000          |
| Total cholesterol, mM                                                                                                                                                                                                                                                                                                        | 179±49                 | 208±40                  | 0.000          |
| LDL cholesterol, mM                                                                                                                                                                                                                                                                                                          | 104±42                 | 119±37                  | 0.000          |
| HDL cholesterol, mM                                                                                                                                                                                                                                                                                                          | 52±28                  | 66±18                   | 0.000          |
| Triglycerides, mM                                                                                                                                                                                                                                                                                                            | ↑131±68                | 114±79                  | 0.007          |
| Established risk factors                                                                                                                                                                                                                                                                                                     |                        |                         |                |
| BMI, kg/m <sup>2</sup>                                                                                                                                                                                                                                                                                                       | NA                     | 26.3±4.7                |                |
| GFR, mL/min/1.73 m <sup>2</sup>                                                                                                                                                                                                                                                                                              | 72.8±18.0              | 86.4±7.8                | 0.000          |
| Earlier CVD, %                                                                                                                                                                                                                                                                                                               | 23.3                   | 2.3                     | 0.000          |
| Earlier MI #6, %                                                                                                                                                                                                                                                                                                             | 8.7                    | 0.7                     | 0.000          |
| Other heart disease, %                                                                                                                                                                                                                                                                                                       | 22.5                   | 4.3                     | 0.000          |
| Hypertension, %                                                                                                                                                                                                                                                                                                              | 77.5                   | 21.7                    | 0.000          |
| Diabetes, %                                                                                                                                                                                                                                                                                                                  | 24.0                   | 3.7                     | 0.000          |
| Smoking, %                                                                                                                                                                                                                                                                                                                   | 47.5                   | NA                      |                |
| Medications, %                                                                                                                                                                                                                                                                                                               | 78.3                   | 7.7%                    | 0.000          |
| Age, years                                                                                                                                                                                                                                                                                                                   | 68±12                  | 50±17                   | 0.000          |
| Female sex, %                                                                                                                                                                                                                                                                                                                | 45.0                   | 59.7                    | 0.000          |
| GFR, glomerular filtration rate; BMI, body mass index; CVD, cardiovascular disease; LDL, low-density lipoprotein; HDL, High-density lipoprotein; CLT, clot lysis time; Abs <sub>max</sub> , maximum absorbance at 335 nm; NA, not available. Up arrows ↑ indicate variables that were increased in ischemic stroke patients. |                        |                         |                |

| Table S5. Correlations between elements in healthy controls and ischemic stroke patients: coefficients and P-values. |                            |                |               |                             |                             |                             |                             |                             |               |                             |                             |               |                             |                             |                             |
|----------------------------------------------------------------------------------------------------------------------|----------------------------|----------------|---------------|-----------------------------|-----------------------------|-----------------------------|-----------------------------|-----------------------------|---------------|-----------------------------|-----------------------------|---------------|-----------------------------|-----------------------------|-----------------------------|
| Element                                                                                                              | Ni                         | Cu             | Zn            | Ca                          | Sr                          | Mg                          | Li                          | Na                          | K             | Be                          | Al                          | B             | P                           | S                           | Si                          |
|                                                                                                                      | Healthy controls (n = 291) |                |               |                             |                             |                             |                             |                             |               |                             |                             |               |                             |                             |                             |
| Fe #45                                                                                                               | ns                         | -.14<br>P=.016 | ns            | ns                          | ns                          | ns                          | ns                          | ns                          | ns            | ns                          | ns                          | ns            | ns                          | .21<br>P=.000               | .12<br>P=.037               |
| Ni #48                                                                                                               |                            | .17<br>P=.003  | ns            | .19<br>P=.001               | ns                          | ns                          | ns                          | ns                          | .12<br>P=.038 | ns                          | <b>.29</b><br><b>P=.000</b> | ns            | ns                          | ns                          | ns                          |
| Cu #46                                                                                                               |                            |                | .14<br>P=.014 | <b>.28</b><br><b>P=.000</b> | .13<br>P=.029               | ns                          | <b>.25</b><br><b>P=.000</b> | <b>.31</b><br><b>P=.000</b> | ns            | <b>.31</b><br><b>P=.000</b> | <b>.21</b><br><b>P=.000</b> | ns            | .37<br>P=.000               | -.14<br>P=.020              | ns                          |
| Zn #47                                                                                                               |                            |                |               | <b>.51</b><br><b>P=.000</b> | .19<br>P=.001               | <b>.36</b><br><b>P=.000</b> | <b>.26</b><br><b>P=.000</b> | <b>.32</b><br><b>P=.000</b> | ns            | <b>.52</b><br><b>P=.000</b> | <b>.22</b><br><b>P=.000</b> | .14<br>P=.019 | ns                          | .18<br>P=.002               | ns                          |
| Ca #49                                                                                                               |                            |                |               |                             | <b>.23</b><br><b>P=.000</b> | <b>.44</b><br><b>P=.000</b> | <b>.17</b><br><b>P=.002</b> | <b>.60</b><br><b>P=.000</b> | .12<br>P=.032 | <b>.36</b><br><b>P=.000</b> | .15<br>0.012                | ns            | .29<br>P=.000               | .51<br>P=.000               | ns                          |
| Sr #69                                                                                                               |                            |                |               |                             |                             | <b>.13</b><br><b>P=.020</b> | <b>.35</b><br><b>P=.000</b> | ns                          | ns            | <b>.27</b><br><b>P=.000</b> | .15<br>P=.011               | ns            | ns                          | ns                          | ns                          |
| Mg #50                                                                                                               |                            |                |               |                             |                             |                             | ns                          | <b>.45</b><br><b>P=.000</b> | .15<br>P=.011 | ns                          | ns                          | ns            | <b>.24</b><br><b>P=.000</b> | <b>.37</b><br><b>P=.000</b> | ns                          |
| Li #51                                                                                                               |                            |                |               |                             |                             |                             |                             | <b>.32</b><br><b>P=.000</b> | ns            | <b>.47</b><br><b>P=.000</b> | <b>.24</b><br><b>P=.000</b> | .14<br>P=.015 | ns                          | -.27<br>P=.000              | -.23<br>P=.000              |
| Na #52                                                                                                               |                            |                |               |                             |                             |                             |                             |                             | ns            | <b>.33</b><br><b>P=.000</b> | .12<br>P=.044               | ns            | <b>.25</b><br><b>P=.000</b> | .19<br>P=.001               | ns                          |
| K #53                                                                                                                |                            |                |               |                             |                             |                             |                             |                             |               | ns                          | ns                          | ns            | .13<br>P=.023               | ns                          | ns                          |
| Be #55                                                                                                               |                            |                |               |                             |                             |                             |                             |                             |               |                             | <b>.30</b><br><b>P=.000</b> | .18<br>P=.001 | ns                          | -.28<br>P=.000              | -.23<br>P=.000              |
| Al #58                                                                                                               |                            |                |               |                             |                             |                             |                             |                             |               |                             |                             | ns            | ns                          | -.18<br>P=.002              | -.16<br>P=.007              |
| B #54                                                                                                                |                            |                |               |                             |                             |                             |                             |                             |               |                             |                             |               | ns                          | ns                          | ns                          |
| P #56                                                                                                                |                            |                |               |                             |                             |                             |                             |                             |               |                             |                             |               |                             | .15<br>P=.009               | ns                          |
| S #57                                                                                                                |                            |                |               |                             |                             |                             |                             |                             |               |                             |                             |               |                             |                             | <b>.26</b><br><b>P=.000</b> |

\* The strongest correlations are highlighted in **bold text**.

| Table S3, continued.                                                                                                                                                                        |                             |    |                             |                             |                             |                             |    |                             |                             |                              |                              |                              |                             |                              |                              |
|---------------------------------------------------------------------------------------------------------------------------------------------------------------------------------------------|-----------------------------|----|-----------------------------|-----------------------------|-----------------------------|-----------------------------|----|-----------------------------|-----------------------------|------------------------------|------------------------------|------------------------------|-----------------------------|------------------------------|------------------------------|
| Element                                                                                                                                                                                     | Ni                          | Cu | Zn                          | Ca                          | Sr                          | Mg                          | Li | Na                          | K                           | Be                           | Al                           | B                            | P                           | S                            | Si                           |
| Stroke patients* (n = 262)                                                                                                                                                                  |                             |    |                             |                             |                             |                             |    |                             |                             |                              |                              |                              |                             |                              |                              |
| Fe #45                                                                                                                                                                                      | <b>.21</b><br><b>P=.001</b> | ns | <b>.34</b><br><b>P=.000</b> | ns                          | ns                          | ns                          | ns | <b>.41</b><br><b>P=.000</b> | <b>.21</b><br><b>P=.001</b> | <b>-.45</b><br><b>P=.000</b> | <b>-.37</b><br><b>P=.000</b> | <b>-.17</b><br><b>P=.006</b> | <b>.12</b><br><b>P=.046</b> | <b>-.17</b><br><b>P=.006</b> | <b>.47</b><br><b>P=.000</b>  |
| Ni #48                                                                                                                                                                                      |                             | ns | ns                          | ns                          | ns                          | ns                          | ns | ns                          | ns                          | ns                           | ns                           | ns                           | ns                          | ns                           | ns                           |
| Cu #46                                                                                                                                                                                      |                             |    | ns                          | <b>.25</b><br><b>P=.000</b> | <b>.17</b><br><b>P=.007</b> | ns                          | ns | <b>.32</b><br><b>P=.000</b> | ns                          | <b>-.14</b><br><b>P=.020</b> | ns                           | ns                           | ns                          | ns                           | <b>.27</b><br><b>P=.000</b>  |
| Zn #47                                                                                                                                                                                      |                             |    |                             | <b>.24</b><br><b>P=.000</b> | ns                          | <b>.18</b><br><b>P=.004</b> | ns | <b>.15</b><br><b>P=.017</b> | ns                          | ns                           | ns                           | ns                           | <b>.17</b><br><b>P=.007</b> | <b>.25</b><br><b>P=.000</b>  | ns                           |
| Ca #49                                                                                                                                                                                      |                             |    |                             |                             | <b>.27</b><br><b>P=.000</b> | <b>.38</b><br><b>P=.000</b> | ns | <b>.43</b><br><b>P=.000</b> | <b>.26</b><br><b>P=.000</b> | <b>.17</b><br><b>P=.007</b>  | ns                           | ns                           | <b>.42</b><br><b>P=.000</b> | <b>.65</b><br><b>P=.000</b>  | <b>.18</b><br><b>P=.003</b>  |
| Sr #69                                                                                                                                                                                      |                             |    |                             |                             |                             | ns                          | ns | <b>.17</b><br><b>P=.005</b> | ns                          | ns                           | ns                           | ns                           | ns                          | ns                           | <b>.30</b><br><b>P=.000</b>  |
| Mg #50                                                                                                                                                                                      |                             |    |                             |                             |                             |                             | ns | ns                          | ns                          | <b>.26</b><br><b>P=.000</b>  | <b>.18</b><br><b>P=.004</b>  | ns                           | <b>.28</b><br><b>P=.000</b> | <b>.48</b><br><b>P=.000</b>  | ns                           |
| Li #51                                                                                                                                                                                      |                             |    |                             |                             |                             |                             |    | <b>.24</b><br><b>P=.000</b> | ns                          | <b>.15</b><br><b>P=.017</b>  | ns                           | ns                           | ns                          | ns                           | <b>.14</b><br><b>P=.022</b>  |
| Na #52                                                                                                                                                                                      |                             |    |                             |                             |                             |                             |    |                             | <b>.18</b><br><b>P=.003</b> | <b>-.46</b><br><b>P=.000</b> | <b>-.16</b><br><b>P=.011</b> | ns                           | ns                          | <b>-.14</b><br><b>P=.021</b> | <b>.53</b><br><b>P=.000</b>  |
| K #53                                                                                                                                                                                       |                             |    |                             |                             |                             |                             |    |                             |                             | ns                           | ns                           | ns                           | ns                          | ns                           | <b>.16</b><br><b>P=.009</b>  |
| Be #55                                                                                                                                                                                      |                             |    |                             |                             |                             |                             |    |                             |                             |                              | <b>.45</b><br><b>P=.000</b>  | <b>.17</b><br><b>P=.006</b>  | ns                          | <b>.46</b><br><b>P=.000</b>  | <b>-.38</b><br><b>P=.000</b> |
| Al #58                                                                                                                                                                                      |                             |    |                             |                             |                             |                             |    |                             |                             |                              |                              | <b>.13</b><br><b>P=.041</b>  | ns                          | <b>.23</b><br><b>P=.000</b>  | <b>-.16</b><br><b>P=.007</b> |
| B #54                                                                                                                                                                                       |                             |    |                             |                             |                             |                             |    |                             |                             |                              |                              |                              | ns                          | ns                           | ns                           |
| P #56                                                                                                                                                                                       |                             |    |                             |                             |                             |                             |    |                             |                             |                              |                              |                              |                             | <b>.43</b><br><b>P=.000</b>  | ns                           |
| S #57                                                                                                                                                                                       |                             |    |                             |                             |                             |                             |    |                             |                             |                              |                              |                              |                             |                              | <b>-.25</b><br><b>P=.000</b> |
| *Elements associated with stroke are highlighted in light green. Correlations changed in stroke are highlighted in yellow. The strongest correlations are highlighted in <b>bold text</b> . |                             |    |                             |                             |                             |                             |    |                             |                             |                              |                              |                              |                             |                              |                              |
